# Supplementary material
Source: Research Square preprint supplement (doi:10.21203/rs.3.rs-8746379/v1)
Supplement: Supplementary file 1 [file 22d9795f0c75268649e37f2e.docx]

**SUPPLEMENTARY TABLE II: Factors influencing marital status post-treatment**

| **Covariates** | **Got married by follow-up** | **Unmarried at follow-up** | **Total** | **P-value** |
| --- | --- | --- | --- | --- |
| **PATIENT-RELATED FACTORS** |  |  |  |  |
| ***Sex*** |  |  |  | 0.469 |
| Male | 4 (9.3) | 39 (90.7) | 43 (78.2) |  |
| Female | 2 (16.7) | 10 (83.3) | 12 (21.8) |  |
| ***Comorbidities (ACE-27)*** |  |  |  | 0.200 |
| None | 5 (9.6) | 47 (90.4) | 52 (94.5) |  |
| Mild | 1 (33.3) | 2 (66.7) | 3 (5.5) |  |
| Moderate | 0 (0) | 0 (0) | 0 (0) |  |
| ***Education*** |  |  |  | 0.590 |
| Not graduate | 4 (12.9) | 27 (87.1) | 31 (56.4) |  |
| At least graduate | 2 (8.3) | 22 (91.7) | 24 (43.6) |  |
| ***Employment*** |  |  |  | 0.322 |
| Student/Employed | 6 (12.5) | 42(87.5) | 48 (87.3) |  |
| Unemployed/Retired | 0 (0) | 7 (100) | 7 (12.7) |  |
| **TUMOUR-RELATED FACTORS** |  |  |  |  |
| ***8th AJCC Stage*** |  |  |  | **0.013** |
| I-III | 5 (10.0) | 45 (90.0) | 50 (90.9) |  |
| IVA | 1 (100) | 0 (0) | 1 (1.8) |  |
| IVB | 0 (0) | 4 (100) | 4 (7.3) |  |
| ***M0 vs. M1*** |  |  |  | 0.467 |
| M0 | 6 (11.8) | 45 (88.2) | 51 (92.7) |  |
| M1 | 0 (0) | 4 (100) | 4 (100) |  |
| ***Histopathology*** |  |  |  | 0.221 |
| Undifferentiated (WHO Type III) | 6 (13.3) | 39 (86.7) | 45 (81.8) |  |
| Other histologies | 0 (0) | 10 (100) | 10 (100) |  |
| ***Recurrence*** |  |  |  | 0.533 |
| Yes | 0 (0) | 3 (100) | 3 (5.5) |  |
| No | 6 (11.5) | 46 (88.5) | 52 (94.5) |  |
| **TREATMENT-RELATED FACTORS** |  |  |  |  |
| ***Radiotherapy dose*** |  |  |  | 0.092 |
| 66Gy/30# | 5 (17.9) | 23 (82.1) | 27 (49.1) |  |
| 70Gy/35# | 1 (3.7) | 26 (96.3) | 28 (50.9) |  |
| ***Chemotherapy*** |  |  |  | 0.614 |
| Received | 6 (11.3) | 47 (88.7) | 53 (96.4) |  |
| Did not receive | 0 (0) | 2 (100) | 2 (3.6) |  |
| ***ACUTE TOXICITIES*** |  |  |  |  |
| ***Acute dermatitis*** |  |  |  | 0.632 |
| <Grade III | 5 (10.2) | 44 (89.8) | 49 (89.1) |  |
| ≥Grade III | 1 (16.7) | 5 (83.3) | 6 (10.9) |  |
| ***Acute mucositis*** |  |  |  | 0.412 |
| <Grade III | 6 (12.0) | 44 (88.0) | 50 (90.9) |  |
| ≥Grade III | 0 (0) | 5 (100) | 5 (100) |  |
| ***Acute dysphagia*** |  |  |  | 0.284 |
| <Grade III | 6 (12.8) | 41 (87.2) | 47 (85.5) |  |
| ≥Grade III | 0 (0) | 8 (100) | 8 (14.5) |  |
| ***LATE TOXICITIES*** |  |  |  |  |
| ***Xerostomia*** |  |  |  | 0.348 |
| <Grade 2 | 5 (9.8) | 4690.2) | 51 (92.7) |  |
| ≥Grade 2 | 1 (25.0) | 3 (75.0) | 4 (7.3) |  |
| ***Hearing loss*** |  |  |  | 0.632 |
| <Grade 2 | 5 (10.2) | 44 (89.8) | 49 (89.1) |  |
| ≥Grade 2 | 1 (16.7) | 5 (83.3) | 6 (10.9) |  |
| ***Hypothyroidism*** |  |  |  | 0.667 |
| <Grade 2 | 3 (13.0) | 20 (87.0) | 23 (41.8) |  |
| ≥Grade 2 | 3 (9.4) | 29 (90.6) | 32 (58.2) |  |
| ***Decreased vision*** |  |  |  | 0.071 |
| <Grade 2 | 5 (9.4) | 48 (90.6) | 53 (96.4) |  |
| ≥Grade 2 | 1 (50.0) | 1 (50.0) | 2 (3.6) |  |
| ***Subcutaneous fibrosis*** |  |  |  | 0.467 |
| <Grade 2 | 6 (11.8) | 45 (88.2) | 51 (92.7) |  |
| ≥Grade 2 | 0 (0) | 4 (100) | 4 (7.3) |  |
| ***Trismus*** |  |  |  | 0.724 |
| <Grade 2 | 6 (11.1) | 48 (88.9) | 54 (98.2) |  |
| ≥Grade 2 | 0 (0) | 1 (100) | 1 (1.8) |  |
| ***Dysphagia*** |  |  |  | 0.724 |
| <Grade 2 | 6 (11.1) | 48 (88.9) | 54 (98.2) |  |
| ≥Grade 2 | 0 (0) | 1 (100) | 1 (1.8) |  |
| **TOTAL** | **6 (10.9)** | **49 (89.1)** | **55 (100)** |  |
