# Supplementary material
Source: Research Square preprint supplement (doi:10.21203/rs.3.rs-8746379/v1)
Supplement: Supplementary file 2 [file 4fce74c3514ccb618d02483c.docx]

**SUPPLEMENTARY TABLE I: Radiotherapy-related acute and late toxicities in our study population**

| **RT RELATED TOXICITIES** | **NUMBER** | **PERCENTAGE** |
| --- | --- | --- |
| **Acute toxicities (≥Grade III RTOG)** |  |  |
| Dysphagia | 29 | 14.9 |
| Dermatitis | 24 | 12.4 |
| Mucositis | 15 | 7.7 |
| **Late toxicities (≥Grade 2 CTCAE v5.0)** |  |  |
| Hypothyroidism | 105 | 54.1 |
| Hearing loss | 38 | 19.6 |
| Subcutaneous fibrosis | 32 | 16.5 |
| Xerostomia | 32 | 16.5 |
| Cranial neuropathy | 7 | 3.6 |
| Decreased vision | 7 | 3.6 |
| Trismus | 7 | 3.6 |
| Dysphagia | 5 | 2.6 |
| Dermatitis | 5 | 2.6 |
| Cataract | 4 | 2.1 |

RT- Radiotherapy; RTOG- Radiation Therapy Oncology Group; CTCAE- Common Terminology Criteria for Adverse Events
